# Supplementary material for: DFT Insights into Substituent Effects on Trithiocarbonate Linkages: Electronic Structure, Stability and Reactivity
Source: Research Square preprint supplement (doi:10.21203/rs.3.rs-5389568/v1), 2024-11-22

**Graphical Abstract**

**DFT Insights into Substituent Effects on Trithiocarbonate Linkages: Electronic Structure, Stability and Reactivity**

Rahul Verma,Pankaj Kumar Kushwaha, Suresh Kumar Arya, Amit K. Chaturvedi, Sunil Kumar Srivastava, Devdutt Chaturvedi,*

This study theoretically investigates trithiocarbonate (TTC) linkages, essential in polymerization and pharmacology, using Density Functional Theory (DFT). The impact of various substituents on electronic structure, stability, and reactivity is explored. Key parameters such as HOMO, LUMO, and energy gaps reveal molecular stability. MEP analysis identifies reactive sites, while global reactivity descriptors, including electrophilicity index and bond dissociation energies (BDE), highlight TTC1–TTC11's high reactivity and classify TTC12, TTC13, and TTC14 as super-electrophilic. Insights into the influence of ring-structured substituents versus alkyl spacers inform the design of tailored TTC compounds for enhanced properties and applications.


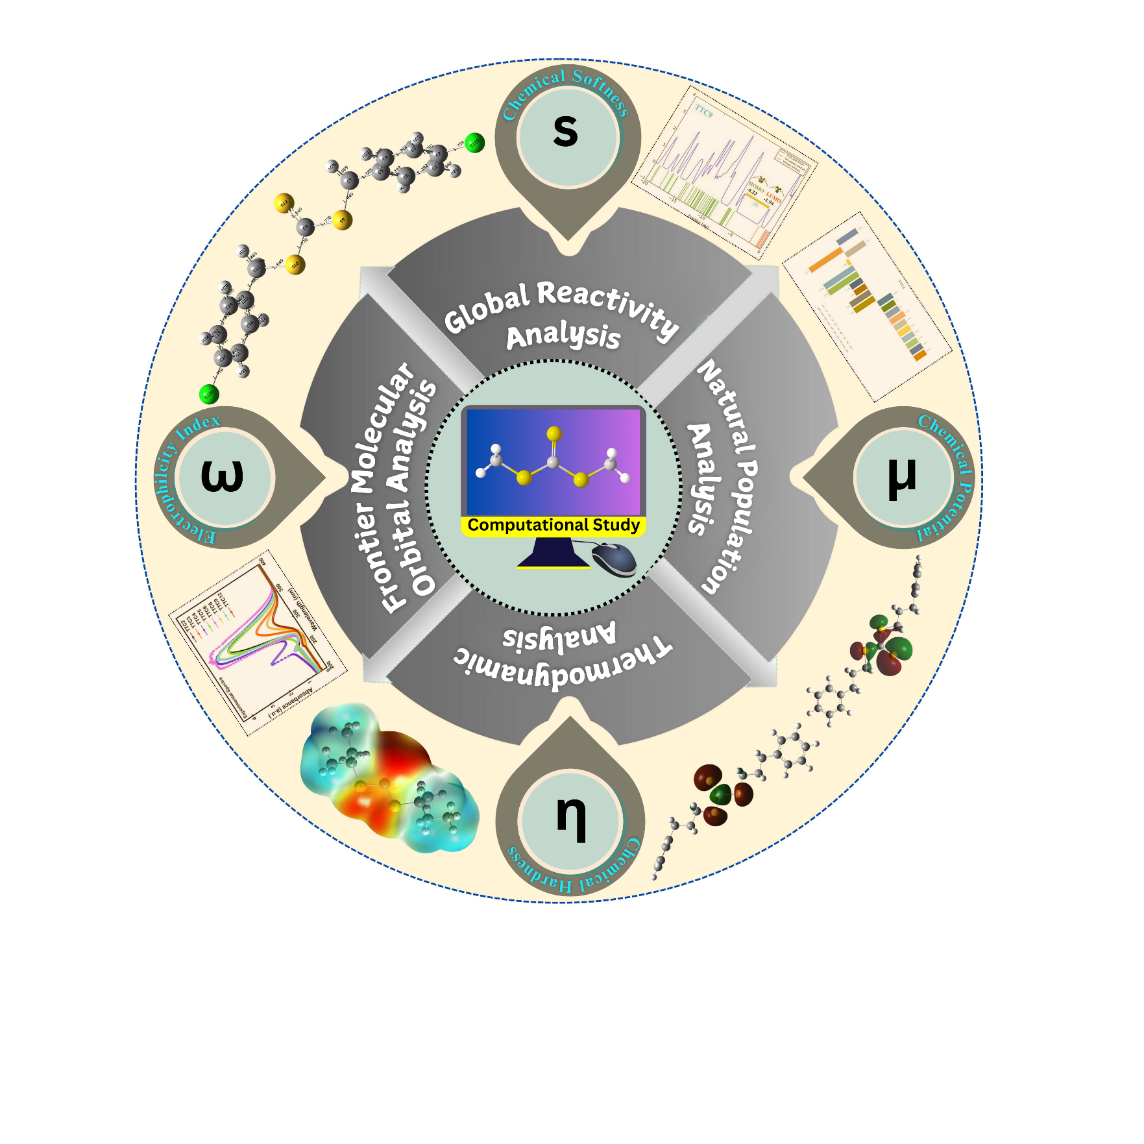

Supplement: Supplementary file 1 [file 45998e292503c91c50d97ae5.docx]
